# Supplementary material
Source: PubMed Central journal article supplement (PMC7944582)
Supplement: NIHMS1674558-supplement-Supplementary.pdf [file NIHMS1674558-supplement-Supplementary.pdf]

**Cellular delivery of bioorthogonal pretargeting therapeutics in PSMA-positive prostate cancer**

*Sudath Hapuarachchige<sup>1\*</sup>, Colin T. Huang<sup>1</sup>, Madeline C. Donnelly<sup>1</sup>, Cyril Bařinka<sup>2</sup>, Shawn E. Lupold<sup>3</sup>, Martin G. Pomper<sup>1,3,4</sup>, and Dmitri Artemov<sup>1,4\*</sup>*

<sup>1</sup>The Russell H. Morgan Department of Radiology and Radiological Science, The Johns Hopkins University School of Medicine, 720 Rutland Avenue, Baltimore, Maryland 21205, USA

<sup>2</sup>Laboratory of Structural Biology, Institute of Biotechnology, Prumyslova 595, 252 50 Vestec Czech Republic

<sup>3</sup>The James Buchanan Brady Urologic Institute and Department of Urology, Johns Hopkins School of Medicine, Baltimore, MD, USA

<sup>4</sup>Department of Oncology, The Sidney Kimmel Comprehensive Cancer Center, The Johns Hopkins University School of Medicine, Baltimore, Maryland 21205, USA

## 1. MALDI-TOF analysis of components.

Samples of components were prepared following standard protocol for MALDI analysis using sinapinic acid as the matrix. MALDI-TOF spectra were taken following standard protocol optimized for protein analysis. Figure S1 shows embedded MALDI-TOF spectra of initial protein and protein after modification.

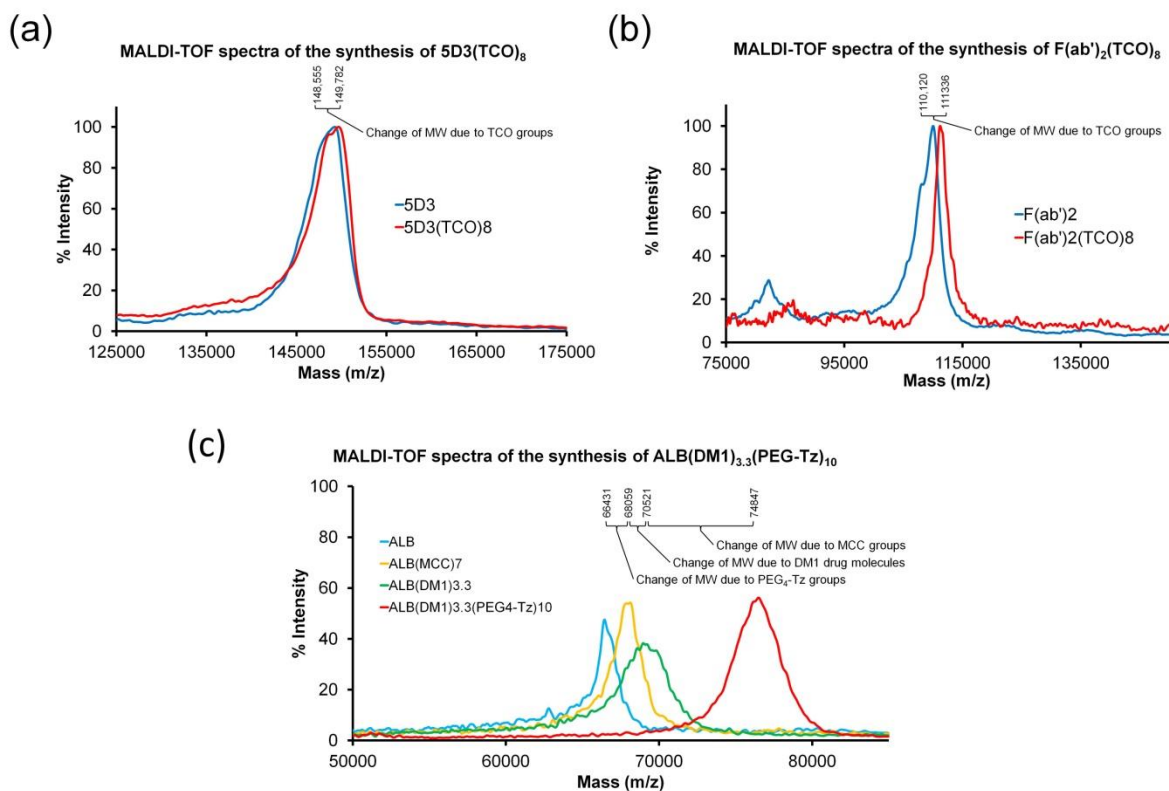

**Figure S1.** MALDI-TOF analysis of components. Embedded MALDI-TOF spectra of (a) 5D3 mAb and 5D3(TCO)<sub>8</sub>, (b) F(ab')<sub>2</sub> fragment and F(ab')<sub>2</sub>(TCO)<sub>8</sub>, and (c) Albumin (ALB), ALB(MCC)<sub>7</sub>, ALB(DM1)<sub>3.3</sub>, and ALB(DM1)<sub>3.3</sub>(PEG<sub>4</sub>-Tz)<sub>10</sub>.

## 2. Dynamic light scattering (DLS) analysis of components

Samples of components (~1.0 mg/mL) were prepared in PBS (pH 7.2) and hydrodynamic diameter of components was measured using a MALVERN-Nano series Zetasizer. Slight changes of hydrodynamic diameter were observed in all components after modification but were not statistically significant. Graphs of Volume % distribution of sizes (nm) are shown in Figure S2.

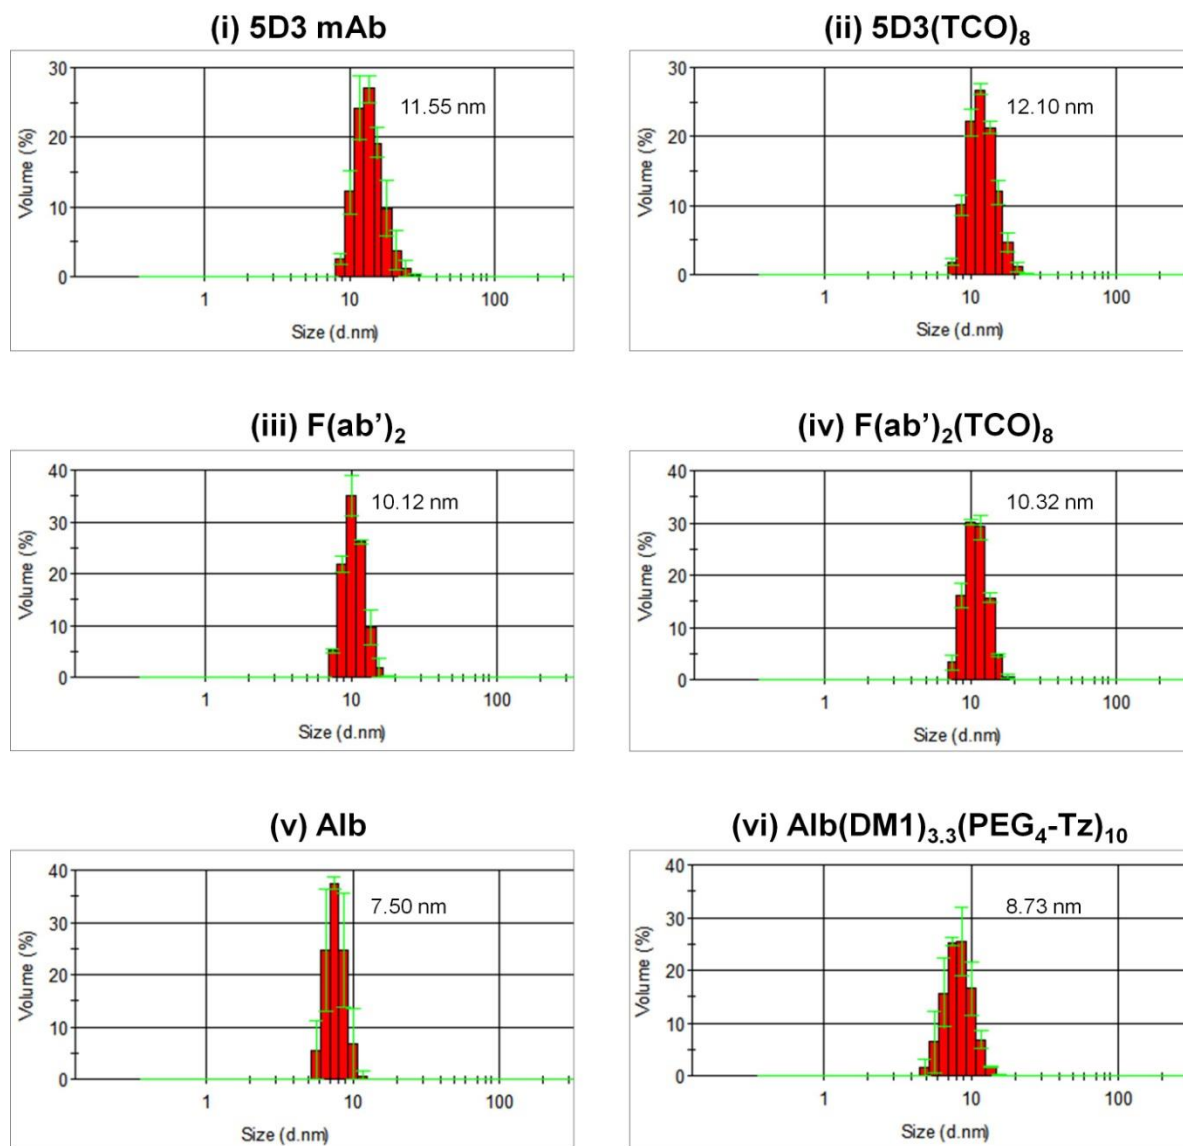

**Figure S2.** DLS analysis of components.

### 3. Internalization of anti-PSMA 5D3 mAb and F(ab')<sub>2</sub>

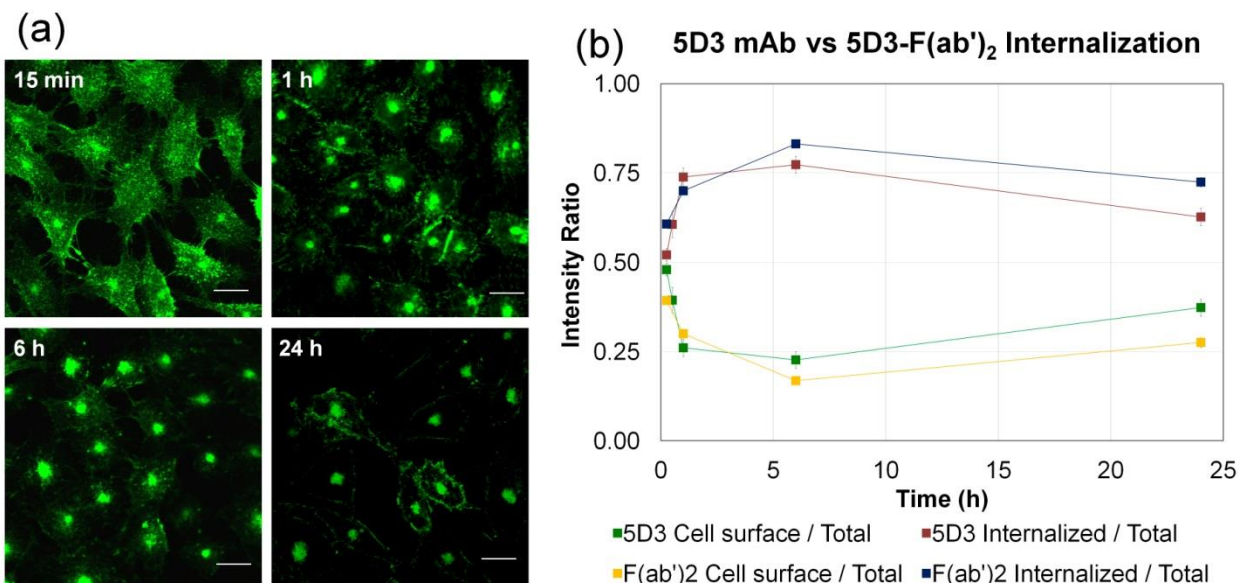

**Figure S3.** Internalization of anti-PSMA 5D3 mAb. (a) Fluorescence images of 5D3(AF-488)<sub>2</sub> internalization in PSMA(+) PC3-PIP cells (Scale bar: 20 μm). (b) Change of the fluorescence intensities of 5D3(AF-488)<sub>2</sub> and F(ab')<sub>2</sub>(AF-488)<sub>2</sub> in the cytoplasm and cell surface.

### 4. ALB(PEG<sub>4</sub>-Tz)<sub>10</sub>(Rhod)<sub>2</sub> in PC3-PIP cells

PC3-PIP cells grown in 4-well chamber slides as describes in the Method 2.8 were treated with ALB(DM1)<sub>3.3</sub>(PEG<sub>4</sub>-Tz)<sub>10</sub>(Rhod)<sub>2</sub> (150 μL of 50 μg/mL in DPBS) at 37 °C for 30 min. After the washing step, DPBS was replaced by the growth medium and the incubation was continued for 2 h. After cells were fixed by 4% PFA for 20 min at 4 °C and washed with deionized H<sub>2</sub>O. Cells were counterstained with Hoechst 33342 and imaged using the Zeiss AxioObserver confocal fluorescence microscope with LSM700 confocal module and analyzed using NIH ImageJ.

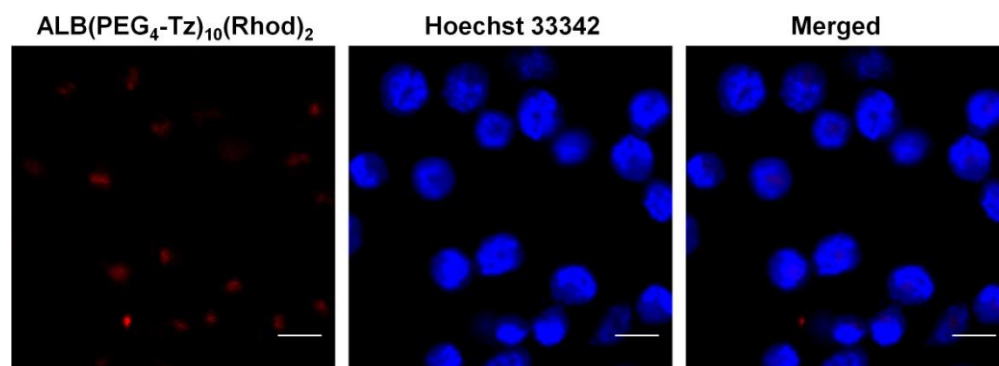

**Figure S4.** Fluorescence images of PSMA(+) PC3-PIP cells treated with ALB(PEG<sub>4</sub>-Tz)<sub>10</sub>(Rhod)<sub>2</sub> without pretargeting components.
